# Supplementary material
Source: PubMed Central journal article supplement (PMC4584395)
Supplement: NIHMS721186-supplement-supplement_1.pdf [file NIHMS721186-supplement-supplement_1.pdf]

## Online Supporting Material

**Supplemental Table 1 Targeted foods and beverages and corresponding substitution foods and beverages used for simulations<sup>1</sup>**

| Targeted Food/Beverage                |                      | Substitution Food/Beverage           |                      |
|---------------------------------------|----------------------|--------------------------------------|----------------------|
| Description                           | Amount, g            | Description                          | Amount, g            |
| White Bread, Spaghetti, and Rice      |                      |                                      |                      |
| Bread, white                          | 26 (1 regular slice) | Bread, wheat                         | 28 (1 regular slice) |
| Toast, white                          | 23 (1 regular slice) | Toast, wheat                         | 25 (1 regular slice) |
| Bread, white, homemade/bakery         | 44 (1 regular slice) | Bread, wheat, homemade/bakery        | 44 (1 regular slice) |
| Roll, white (footlong)                | 86 (1 bun)           | Roll, wheat (HB/HD)                  | 86 (2 buns)          |
| Roll, white (HB/HD)                   | 43 (1 bun)           | Roll, wheat (HB/HD)                  | 43 (1 bun)           |
| Roll, white (NFS)                     | 43 (1 bun)           | Roll, wheat (HB/HD)                  | 43 (1 bun)           |
| Roll, white (medium)                  | 36 (1 bun)           | Roll, wheat (medium)                 | 36 (1 bun)           |
| Roll, white (crescent)                | 28 (1 bun)           | Roll, wheat (small)                  | 28 (1 bun)           |
| Roll, white (small)                   | 28 (1 bun)           | Roll, wheat (small)                  | 28 (1 bun)           |
| Roll, white, homemade/bakery (large)  | 43 (1 bun)           | Roll, wheat, homemade/bakery (HB/HD) | 43 (1 bun)           |
| Roll, white, homemade/bakery (HB/HD)  | 43 (1 bun)           | Roll, wheat, homemade/bakery (HB/HD) | 43 (1 bun)           |
| Roll, white, homemade/bakery (NFS)    | 43 (1 bun)           | Roll, wheat, homemade/bakery (HB/HD) | 43 (1 bun)           |
| Roll, white, homemade/bakery (medium) | 36 (1 bun)           | Roll, wheat, homemade/bakery (HB/HD) | 36 (1 bun)           |
| Roll, white, homemade/bakery (small)  | 28 (1 bun)           | Roll, wheat, homemade/bakery (HB/HD) | 36 (1 bun)           |
| Biscuit, white, refrigerated dough    | 19 (1 medium)        | Biscuit, wheat                       | 60 (1 medium)        |
| Biscuit, white, commercial baked      | 51 (1 medium)        | Biscuit, wheat                       | 60 (1 medium)        |
| Biscuit, white, homemade              | 30 (1 medium)        | Biscuit, wheat                       | 60 (1 medium)        |
| Spaghetti, white                      | 140 (1 cup) cooked   | Spaghetti, wheat                     | 140 (1 cup) cooked   |
| Rice, white, regular (NFS)            | 158 (1 cup) cooked   | Rice, brown, regular, NF             | 195 (1 cup) cooked   |
| Rice (NFS)                            | 158 (1 cup) cooked   | Rice, brown, regular, NF             | 195 (1 cup) cooked   |
| Rice, white, regular, NF              | 158 (1 cup) cooked   | Rice, brown, regular, NF             | 195 (1 cup) cooked   |
| Rice, white, instant (NFS)            | 165 (1 cup) cooked   | Rice, brown, regular, NF             | 195 (1 cup) cooked   |
| Rice, white, instant, NF              | 165 (1 cup) cooked   | Rice, brown, regular, NF             | 195 (1 cup) cooked   |
| Rice, white, regular, fat             | 163 (1 cup) cooked   | Rice, brown, regular, NF             | 195 (1 cup) cooked   |
| Rice, white, instant, fat             | 166 (1 cup) cooked   | Rice, brown, regular, NF             | 195 (1 cup) cooked   |

## Online Supporting Material

| Milk and Cheese                       |                |                                         |                        |
|---------------------------------------|----------------|-----------------------------------------|------------------------|
| Milk (NFS)                            | 244 (237 mL)   | Milk, NF                                | 245 (237 mL)           |
| Milk, whole                           | 244 (237 mL)   | Milk, NF                                | 245 (237 mL)           |
| Milk, RF                              | 244 (237 mL)   | Milk, NF                                | 245 (237 mL)           |
| Milk, chocolate (NFS)                 | 250 (237 mL)   | Milk, NF chocolate                      | 250 (237 mL)           |
| Milk, whole, chocolate                | 250 (237 mL)   | Milk, NF chocolate                      | 250 (237 mL)           |
| Cheese (NFS)                          | 24 (1 slice)   | Cheese, processed, cheddar/American, RF | 21 (1 slice)           |
| Cheese, cheddar/American (NFS)        | 24 (1 slice)   | Cheese, processed, cheddar/American, RF | 21 (1 slice)           |
| Cheese, natural, cheddar/American     | 28 (1 slice)   | Cheese, processed, cheddar/American, RF | 21 (1 slice)           |
| Cheese, processed, cheddar/American   | 28 (1 slice)   | Cheese, processed, cheddar/American, RF | 21 (1 slice)           |
| Cheese spread, cheddar/American based | 34 (1 slice)   | Cheese, processed, cheddar/American, RF | 21 (1 slice)           |
| White Potatoes                        |                |                                         |                        |
| Potato, white, baked, no peel         | 98 (1 medium)  | Potato, sweet, baked, NF (medium)       | 114 (1 medium)         |
| Potato, white, baked, peel            | 122 (1 medium) | Potato, sweet, baked, NF (medium)       | 114 (1 medium)         |
| Potato, white, boiled, NF             | 122 (1 medium) | Potato, sweet, baked, NF (medium)       | 114 (1 medium)         |
| Potato, white, boiled, fat            | 127 (1 medium) | Potato, sweet, baked, NF (medium)       | 114 (1 medium)         |
| French fries, fresh, deep fried       | 57 (1 cup)     | Potato, sweet, baked, NF (medium)       | 114 (1 medium)         |
| French fries, frozen, baked           | 57 (1 cup)     | Potato, sweet, baked, NF (medium)       | 114 (1 medium)         |
| Potato, white, mashed, NF             | 105 (1/2 cup)  | Potato, sweet, baked, NF (medium)       | 114 (1 medium)         |
| Potato, white, mashed, fat            | 105 (1/2 cup)  | Potato, sweet, baked, NF (medium)       | 114 (1 medium)         |
| Potato, white, instant, mashed, fat   | 105 (1/2 cup)  | Potato, sweet, baked, NF (medium)       | 114 (1 medium)         |
| Potato chip, white                    | 20 (1 cup)     | Popcorn, air-popped, NF                 | 24 (3 cups)            |
| French fries, frozen, deep fried      | 57 (1 cup)     | Salad & Dressing <sup>2</sup>           | 73 (1 cup) & 28 ( 2 T) |
| White potato puffs (tater tots)       | 128 (1 cup)    | Salad & Dressing <sup>2</sup>           | 73 (1 cup) & 28 ( 2 T) |
| Grain Snacks                          |                |                                         |                        |
| Corn chips                            | 26 (1 cup)     | Popcorn, air-popped, NF                 | 24 (3 cups)            |
| Corn puffs                            | 35 (1 cup)     | Popcorn, air-popped, NF                 | 24 (3 cups)            |
| Tortilla chips                        | 26 (1 cup)     | Popcorn, air-popped, NF                 | 24 (3 cups)            |
| Popcorn, in oil, no butter            | 33 (3 cups)    | Popcorn, air-popped, NF                 | 24 (3 cups)            |
| Popcorn, in oil, butter               | 42 (3 cups)    | Popcorn, air-popped, NF                 | 24 (3 cups)            |

## Online Supporting Material

|                                      |                     |
|--------------------------------------|---------------------|
| Ground beef (NFS)                    | 113 (patty)         |
| Ground beef, regular                 | 113 (patty)         |
| Ham (NFS)                            | 28 (1 ounce) cooked |
| Bacon (NFS)                          | 8 (1 medium slice)  |
| Bacon, pork (NFS)                    | 8 (1 medium slice)  |
| Bacon, pork, smoked/cured            | 8 (1 medium slice)  |
| Chicken wing, baked/fried, skin      | 19 (1 drummette)    |
| Chicken patty/fillet/tender, breaded | 36 (1 cubic inch)   |
| Hot dog, beef                        | 57 (1 link)         |
| Bologna (NFS)                        | 28 (1 medium slice) |
| Salami (NFS)                         | 23 (1 medium slice) |
| Pork sausage, bulk/link/patty        | 18 (1 cubic inch)   |
| Pork sausage, link, smoked           | 17 (1 cubic inch)   |
| Pork sausage, brown & serve          | 13 (1 link)         |
| Catfish, breaded, fried              | 75 (1 fillet)       |
| Catfish, battered, fried             | 75 (1 fillet)       |
| Shrimp, breaded/battered, fried      | 129 (1 cup)         |
| Cakes                                | varied              |
| Cookies                              | varied              |
| Pies                                 | varied              |
| Pastries                             | varied              |

## Meat

|                                                 |                     |
|-------------------------------------------------|---------------------|
| Ground beef, lean                               | 113 (patty)         |
| Ground beef, lean                               | 113 (patty)         |
| Ham, lean only eaten                            | 28 (1 ounce) cooked |
| Turkey bacon                                    | 11 (1 medium slice) |
| Turkey bacon                                    | 11 (1 medium slice) |
| Turkey bacon                                    | 11 (1 medium slice) |
| Chicken wing, broiled/roasted, no skin          | 12 (1 drummette)    |
| Chicken breast, broiled/roasted, no skin        | 51 (1 cubic inch)   |
| Hot dog, beef, LF                               | 57 (1 link)         |
| Turkey/chicken breast, prepack/deli, lunch meat | 28 (1 medium slice) |
| Turkey/chicken breast, prepack/deli, lunch meat | 28 (1 medium slice) |
| Turkey/pork/beef sausage, smoked, LF            | 16 (1 cubic inch)   |
| Turkey/pork/beef sausage, smoked, LF            | 16 (1 cubic inch)   |
| Turkey sausage, brown & serve, RF               | 20 (1 link)         |
| Catfish, baked/broiled                          | 63 (1 fillet)       |
| Catfish, baked/broiled                          | 63 (1 fillet)       |
| Shrimp, steamed/boiled                          | 145 (1 cup)         |
| <b>Grain Desserts</b>                           |                     |
| Fruit cocktail, cooked/canned, juice pack       | 119 (1/2 cup)       |
| Fruit cocktail, cooked/canned, juice pack       | 119 (1/2 cup)       |
| Fruit cocktail, cooked/canned, juice pack       | 119 (1/2 cup)       |
| Fruit cocktail, cooked/canned, juice pack       | 119 (1/2 cup)       |

## Online Supporting Material

|                                                 | Sugar-sweetened Beverages |            |              |
|-------------------------------------------------|---------------------------|------------|--------------|
| Tea, PS (NFS)                                   | 237 (237 mL)              | Water, tap | 239 (237 mL) |
| Tea, PLES (NFS)                                 | 237 (237 mL)              | Water, tap | 239 (237 mL) |
| Tea, presweetened (NFS)                         | 237 (237 mL)              | Water, tap | 239 (237 mL) |
| Tea, decaffeinated, PLES (NFS)                  | 237 (237 mL)              | Water, tap | 239 (237 mL) |
| Tea, leaf, PS                                   | 237 (237 mL)              | Water, tap | 239 (237 mL) |
| Tea, leaf, PLES                                 | 237 (237 mL)              | Water, tap | 239 (237 mL) |
| Tea, leaf, presweetened (NFS)                   | 237 (237 mL)              | Water, tap | 239 (237 mL) |
| Tea, leaf, decaffeinated, PS                    | 237 (237 mL)              | Water, tap | 239 (237 mL) |
| Tea, leaf, decaffeinated, PLES                  | 237 (237 mL)              | Water, tap | 239 (237 mL) |
| Tea, instant, presweetened (NFS)                | 237 (237 mL)              | Water, tap | 239 (237 mL) |
| Tea, instant, PS                                | 237 (237 mL)              | Water, tap | 239 (237 mL) |
| Tea, instant, PLES                              | 237 (237 mL)              | Water, tap | 239 (237 mL) |
| Tea, instant, decaffeinated, PLES               | 237 (237 mL)              | Water, tap | 239 (237 mL) |
| Carbonated water, sweetened                     | 237 (237 mL)              | Water, tap | 239 (237 mL) |
| Soft drink, cola-type                           | 248 (237 mL)              | Water, tap | 239 (237 mL) |
| Soft drink, cola-type, decaffeinated            | 246 (237 mL)              | Water, tap | 239 (237 mL) |
| Soft drink, pepper-type                         | 248 (237 mL)              | Water, tap | 239 (237 mL) |
| Soft drink, pepper-type, decaffeinated          | 239 (237 mL)              | Water, tap | 239 (237 mL) |
| Cream soda                                      | 247 (237 mL)              | Water, tap | 239 (237 mL) |
| Soft drink, fruit-flavored, caffeine-free       | 246 (237 mL)              | Water, tap | 239 (237 mL) |
| Soft drink, fruit-flavored, caffeine containing | 248 (237 mL)              | Water, tap | 239 (237 mL) |
| Ginger ale                                      | 244 (237 mL)              | Water, tap | 239 (237 mL) |
| Root beer                                       | 246 (237 mL)              | Water, tap | 239 (237 mL) |
| Cola with fruit or vanilla flavor               | 248 (237 mL)              | Water, tap | 239 (237 mL) |
| Carbonated noncitrus juice drink                | 248 (237 mL)              | Water, tap | 239 (237 mL) |
| Fruit drinks                                    | 231-256 (237 mL)          | Water, tap | 239 (237 mL) |
| Fruit-flavored drink, non-carbonated, PMS       | 240 (237 mL)              | Water, tap | 239 (237 mL) |
| Fruit-flavored drink, non-carbonated, PMLES     | 240 (237 mL)              | Water, tap | 239 (237 mL) |

HB/HD, hamburger/hot dog; NFS, not further specified; NF, no fat/nonfat; RF, reduced fat; LF, low fat; T, tablespoon; PS, presweetened with sugar; PLES, presweetened with low energy sweetener; PMS, powdered mix with sugar; PMLES, powdered mix with low energy sweetener.

## Online Supporting Material

<sup>1</sup> Example: Substituting one regular slice of whole wheat bread (28 g) for white bread (26 g) involved the following algorithm for a 25% substitution. Where food code equals white bread, reduce grams, carbohydrate, energy, saturated fat, and sodium amounts by 25% and insert food code for whole wheat bread with its respective nutrient profile: new grams = 0.25 x white bread gram amount consumed x (28 g/26 g); carbohydrates = new grams x (12.9 g carbohydrates/28 g); energy = new grams x (68.9 kcal/28 g); saturated fat = new grams x (0.3 g saturated fat/28 g); sodium = new grams x (147.6 mg sodium/28 g). Although tap water does not contain any carbohydrates, energy, or saturated fat, it does contain a small amount of sodium. Hence it was necessary to insert nutrient data for tap water into the data set.

<sup>2</sup> Salad & Dressing = lettuce salad with assorted vegetables including tomatoes and carrots & reduced energy fat-free Italian dressing.
